# Supplementary material for: Cost of assessing a child for possible autism spectrum disorder? An observational study of current practice in child development centres in the UK
Source: PubMed Central journal article supplement — BMJ Paediatr Open. 2017 Nov 30;1(1):e000052. doi: 10.1136/bmjpo-2017-000052 (PMC5862208; doi:10.1136/bmjpo-2017-000052), 2017-11-30
Supplement: bmjpo-2017-000052supp001.pdf [file bmjpo-2017-000052supp001.pdf]

**10. Are you happy with the pathway you offer?**

To what degree is your pathway determined by available resources?

If you could run your ideal pathway what would you add?

We have not included ongoing support/parent education in "diagnostic pathway". Do you continue long term involvement with families beyond diagnosis and/or offer any psychoeducation?

Do you have input from other agencies eg ed psych, social worker, portage, Early Bird?

Done
